# Supplementary material
Source: MDPI journal article supplement (https://www.mdpi.com/2073-4441/10/3/332)
Supplement: s1 [file s1]

## Supplementary Materials

**Table S1.** Water quality characteristics in several subcatchments in the Pussella-oya catchment during 2008 [9].

| Sub-catchment         | BOD <sub>5</sub><br>(mg/L) | Nitrate-N<br>(mg/L) | Ammonium<br>(mg/L) | Fecal Coliform<br>(cfu/100 mL) |
|-----------------------|----------------------------|---------------------|--------------------|--------------------------------|
| 1                     | 15                         | 7.50                | 0.036              | 3462                           |
| 2                     | 8                          | 2.30                | 0.012              | 1430                           |
| 3                     | 8                          | 8.00                | 0.140              | 232                            |
| 4                     | 6                          | 1.74                | 0.870              | 168                            |
| 5                     | 85                         | 5.52                | 2.320              | 2650                           |
| 6                     | 6                          | 0.14                | 0.480              | 130                            |
| 7                     | 3                          | 2.80                | 0.013              | 232                            |
| 8                     | 2                          | 3.45                | 0.009              | 870                            |
| Class II:<br>bathing* | 4                          | 10                  | -                  | 500                            |

\* Proposed ambient water quality standards in Sri Lanka [24].

**Table S2. Questionnaire for situation assessment close to the selected drainage stream in the selected tea estate, Pussellawa**

House No. or Address:

Owner:

Type of House: ☐ Double barrack ☐ Single Barrack ☐ Self-help housing ☐ Others

**Information of the family members:**

| No.   | Age |      |       |     | Walking<br>Difficulties? | Education<br>Level | Occupation | Income per Month |
|-------|-----|------|-------|-----|--------------------------|--------------------|------------|------------------|
|       | <5  | 6–16 | 17–50 | >50 |                          |                    |            |                  |
| 1     |     |      |       |     |                          |                    |            |                  |
| 2     |     |      |       |     |                          |                    |            |                  |
| 3     |     |      |       |     |                          |                    |            |                  |
| 4     |     |      |       |     |                          |                    |            |                  |
| 5     |     |      |       |     |                          |                    |            |                  |
| 6     |     |      |       |     |                          |                    |            |                  |
| 7     |     |      |       |     |                          |                    |            |                  |
| 8     |     |      |       |     |                          |                    |            |                  |
| Total |     |      |       |     |                          |                    |            |                  |

Animal ownership: Yes/No

If Yes Type and No.....

**Water Availability:**

| Type of water source                                     | $\frac{1}{a \ b}$ |  |  |  |  |  | Distance<br>from Source | Storage Method |
|----------------------------------------------------------|-------------------|--|--|--|--|--|-------------------------|----------------|
| Main source of drinking cooking                          |                   |  |  |  |  |  |                         |                |
| Alternative water source for drinking<br>and cooking     |                   |  |  |  |  |  |                         |                |
| Water source for washing cooking utensils                |                   |  |  |  |  |  |                         |                |
| Water source for bathing and washing<br>cooking utensils |                   |  |  |  |  |  |                         |                |
| Water source for toilet utilities                        |                   |  |  |  |  |  |                         |                |

1a. pipe supply inside house. 1b. pipe supply water outside house. 2. Protected well. 3. unprotected well. 4. Springs. 5. Stream. 6. Rain water

How many hours a day do you get water?

hrs

Sufficient? Yes/No

Are you satisfied with the quality of water? Yes/No

Would you like to receive cleaner water? Yes/No

Boil water before drinking:

Willingness to pay:

Fuel:

### Sanitation:

|                                                 |                          |                                    |                           |                                                        |                                             |
|-------------------------------------------------|--------------------------|------------------------------------|---------------------------|--------------------------------------------------------|---------------------------------------------|
| Availability of excreta disposal facility       | Own latrine              | Public latrine                     | Shared latrine            | Nothing                                                | Other                                       |
| Type of latrine                                 | Simple pit               | VIP                                | Pour flush squatting pan  | Water sealed with a commode                            | Any other                                   |
| Disposal method                                 | Direct to drain          | Cesspit                            | Septic Tank (ST) to drain | ST to soakage pit                                      | Any other                                   |
| Distance from disposal system to nearest stream | <5 m                     | 5–10 m                             | 10–15 m                   | 15–20 m                                                | >20 m                                       |
| How old the system (years)                      |                          |                                    |                           |                                                        |                                             |
| Frequency of filling (years)                    |                          |                                    |                           |                                                        |                                             |
| Disposal method after filling                   | Gully removal            | Manual removal to another Pit      | Pump to drain             | Pump to another pit                                    | Any other                                   |
| If a latrine is not exists                      | Neighbors toilet         | Nearby stream                      | Nearby forest             | drain                                                  | Any other                                   |
| Person with a walking difficulty                | Yes                      | Yes                                | Yes                       | No                                                     | No                                          |
| If so method of excreta disposal                | Separate special latrine | Pot and then dispose to the toilet | Pot and burry             | Pot and dispose to drain                               | Pot and dispose to stream                   |
| Where do you dispose the excreta of babies      | In land                  | Wash in drain                      | Wash in stream            | Dispose to toilet and wash the baby in drain or stream | Dispose to toilet and wash the baby in land |

### Grey water disposal

Is there a sink in the kitchen? Yes/No

How do you dispose the kitchen wastewater?

Do you have a bathroom inside the house? Yes/No

How do you dispose the water from the bathroom?

Distance of disposal system to nearest stream:

### History of waterborne diseases

Diseases: Dysentery, diarrhea, viral hepatitis, any other

Years infected

### Garbage

How do you dispose the garbage: [ ] Burning, [ ] Dispose in bare land, [ ] Dispose in garbage collection pit, [ ] Dispose in nearby stream, [ ] Other?

Do you use the stream water for any purpose?

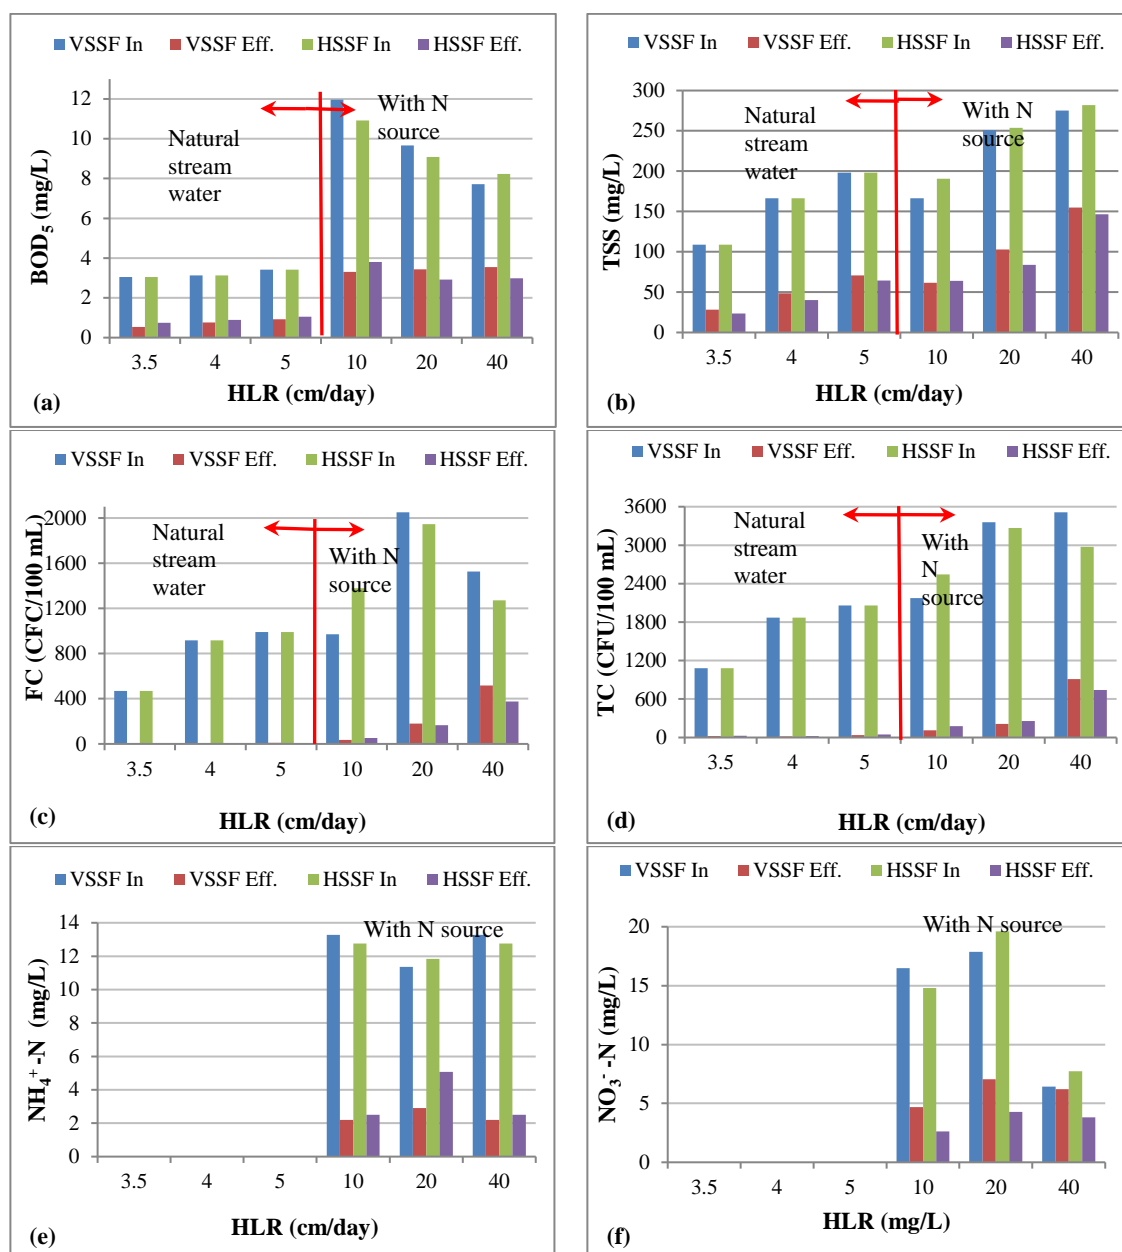

**Figure S1.** The average water quality variation corresponding to different HLRs at the influent and effluents of VSSF and HSSF wetland units for (a) BOD<sub>5</sub>, (b) TSS, (c) FC, (d) TC, (e) NH<sub>4</sub><sup>+</sup>-N, and (f) NO<sub>3</sub><sup>-</sup>-N.
